1 **Ancient genomes reveal hybridisation between extinct short-faced bears and the extant**  
2 **spectacled bear (*Tremarctos ornatus*)**

3

4 Alexander T Salis<sup>1#\*</sup>, Graham Gower<sup>1,2</sup>, Blaine W. Schubert<sup>3</sup>, Leopoldo H. Soibelzon<sup>4</sup>, Holly  
5 Heiniger<sup>1</sup>, Alfredo Prieto<sup>5</sup>, Francisco J. Prevosti<sup>6,7</sup>, Julie Meachen<sup>8</sup>, Alan Cooper<sup>9</sup>, Kieren J.  
6 Mitchell<sup>1\*</sup>

7

8 <sup>1</sup>Australian Centre for Ancient DNA (ACAD), School of Biological Sciences, University of Adelaide, South  
9 Australia 5005, Australia

10 <sup>2</sup>Lundbeck GeoGenetics Centre, GLOBE Institute, University of Copenhagen, Copenhagen 1350, Denmark

11 <sup>3</sup>Center of Excellence in Paleontology and Department of Geosciences, East Tennessee State University  
12 (ETSU), Johnson City, Tennessee 37614, USA

13 <sup>4</sup>División Paleontología de Vertebrados, Museo de La Plata, 1900 La Plata, Argentina

14 <sup>5</sup>Centro de Estudios del Hombre Austral: Instituto de la Patagonia, Universidad de Magallanes, Punta Arenas,  
15 Chile

16 <sup>6</sup>Museo de Ciencias Antropológicas y Naturales, Universidad Nacional de La Rioja (UNLaR), La Rioja,  
17 Argentina

18 <sup>7</sup>Consejo Nacional de Investigaciones Científicas y Técnicas (CONICET)

19 <sup>8</sup>Anatomy Department, Des Moines University, Des Moines, IA, USA

20 <sup>9</sup>South Australian Museum, Adelaide, South Australia 5000, Australia

21 # Lead contact

22 \*Corresponding author(s): A.T.S. ([alexander.t.salis@gmail.com](mailto:alexander.t.salis@gmail.com)), and K.J.M. ([kieren.mitchell@adelaide.edu.au](mailto:kieren.mitchell@adelaide.edu.au))

23

24 **Summary:**

25 Two genera and multiple species of short-faced bear from the Americas went extinct during  
26 or toward the end of the Pleistocene, and all belonged to the endemic New World subfamily  
27 Tremarctinae [1-7]. Two of these species were giants, growing in excess of 1,000 kg [6, 8, 9],  
28 but it remains uncertain how these extinct bears were related to the sole surviving short-faced  
29 bear: the spectacled bear (*Tremarctos ornatus*). Ancient mitochondrial DNA has recently  
30 suggested phylogenetic relationships among these lineages that conflict with interpretations  
31 based on morphology [1, 10-12]. However, widespread hybridisation and incomplete lineage  
32 sorting among extant bears mean that the mitochondrial phylogeny frequently does not reflect  
33 the true species tree [13, 14]. Here we present ancient nuclear genome sequences from  
34 representatives of the two extinct short-faced bear genera, *Arctotherium* and *Arctodus*. Our  
35 new data support a third hypothesis for the relationships among short-faced bears, which  
36 conflicts with existing mitochondrial and morphological data. Based on genome-wide D-  
37 statistics, we suggest that the extant spectacled bear derives substantial ancestry from  
38 Pleistocene hybridisation with an extinct short-faced bear lineage, resulting in a discordant  
39 phylogenetic signal between the mitochondrion and portions of the nuclear genome.

## 40 **Results and Discussion:**

41 The spectacled bear (*Tremarctos ornatus*) is the only extant species of short-faced bear  
42 (Tremarctinae), a once diverse subfamily endemic to the Americas. This subfamily also  
43 includes many species that became extinct during the Pleistocene, including the Florida cave  
44 bear (*Tremarctos floridanus*), two species of North American short-faced bears (*Arctodus*  
45 spp. [3, 4]), and as many as five species of South American short-faced bears (*Arctotherium*  
46 spp. [2, 6]), one of which (*Arctotherium wingei*) has recently been discovered as far north as  
47 the Yucatan of Mexico [5]. Notably, the genera *Arctodus* and *Arctotherium* both included  
48 giant (>1,000kg) forms [8, 9] — *Arctodus simus* and *Arctotherium angustidens*, respectively  
49 — and based on morphology it was hypothesised that these genera were closely related [1, 6,  
50 10, 11]. However, recently published mitochondrial DNA data suggested that *Arctotherium*  
51 was most closely related to the extant spectacled bear, to the exclusion of North American  
52 *Arctodus* [12]. While this result supported the convergent evolution of giant bears in North  
53 and South America, the mitochondrial genome does not always reflect the true relationships  
54 among species [e.g. 15, 16-19]. Importantly, discordance between mitochondrial and nuclear  
55 loci has been previously noted in bears, and has been attributed to a combination of stochastic  
56 processes and the rapid evolution of bears [13], as well as hybridisation between species [13,  
57 14, 20-25]. To further resolve the evolutionary history of short-faced bears, we applied  
58 ancient DNA techniques to retrieve and analyse whole genome data from both *Arctodus* and  
59 *Arctotherium*.

60

61 Ancient DNA (aDNA) was extracted and sequenced from three *Arctodus simus*  
62 specimens: one each from placer mines at Sixty Mile Creek (ACAD 438; Canadian Museum  
63 of Nature; CMN 42388) and Hester Creek (ACAD 344; Yukon Government; YG 76.4) in the  
64 Yukon Territory, Canada; and one from Natural Trap Cave in Wyoming, USA (ACAD 5177;  
65 University of Kansas; KU 31956). We also analysed one specimen of *Arctotherium* sp. from  
66 Cueva del Puma, Patagonia, Chile (ACAD 3599; complete right femur, no. 32104, Centro de  
67 Estudios del Hombre Austral, Instituto de la Patagonia, Universidad de Magallanes). The  
68 *Arctotherium* specimen was previously dated to  $12,105 \pm 175$  cal yBP (Ua-21033) [26], while  
69 two of the *Arctodus* specimens have been dated: ACAD 438 at  $47,621 \pm 984$  cal yBP (TO-  
70 2699) [27] and ACAD 5177 at  $24,300 \pm 208$  cal yBP (OxA-37990) (Table S1). The  
71 *Arctotherium* specimen has yielded mitochondrial aDNA in a previous studies [12], however,  
72 here we shotgun sequenced this specimen, along with the three *A. simus* specimens, at much

73 greater depth in order to reconstruct nuclear genome sequences. Mapping our new  
74 sequencing data from these specimens to the giant panda (*Ailuropoda melanoleuca*) reference  
75 genome (LATN01) yielded average depths of coverage between 0.12x to 5.9x (Table S3).  
76 We compared these new genomic data to previously published genomes from all extant  
77 species of bear (Table S2): spectacled bear, giant panda, brown bear (*Ursus arctos*),  
78 American black bear (*U. americanus*), Asian black bear (*U. thibetanus*), polar bear (*U.*  
79 *maritimus*), sloth bear (*U. ursinus*), and sun bear (*U. malayanus*).

80

81 Phylogenetic analyses on a concatenated dataset of genome-wide SNPs revealed  
82 relationships within Ursinae that were consistent with previous genomic studies: *U.*  
83 *americanus*, *U. maritimus*, and *U. arctos* formed a monophyletic clade sister to a clade  
84 consisting of *U. thibetanus*, *U. malayanus*, and *U. ursinus* [13, 14]. In contrast, within short-  
85 faced bears (Tremarctinae) we recovered strong support for a close relationship between the  
86 spectacled bear and the North American short-faced bear (*Arctodus simus*) to the exclusion of  
87 the South American *Arctotherium* (Figure 1A, Figure S2). This result conflicts with the  
88 mitochondrial tree, which instead supports a clade comprising *Arctotherium* and *Tremarctos*  
89 *ornatus* to the exclusion of *Arctodus simus* [12] (Figure 1B). As the radiation of bears is  
90 thought to have occurred rapidly during the Miocene - Pliocene transition, it is possible that  
91 this discordance could be explained by incomplete lineage sorting (ILS) [28], a process  
92 whereby pre-existing genetic variation in an ancestral species is randomly inherited and fixed  
93 in descendant species [29, 30]. Alternatively, given the observed propensity of bears for  
94 hybridisation [e.g. 13, 14, 20-22, 25, 31], mitochondrial/nuclear discordance within short-  
95 faced bears may instead result from gene flow between *Tremarctos* and either *Arctodus* or  
96 *Arctotherium*.

97

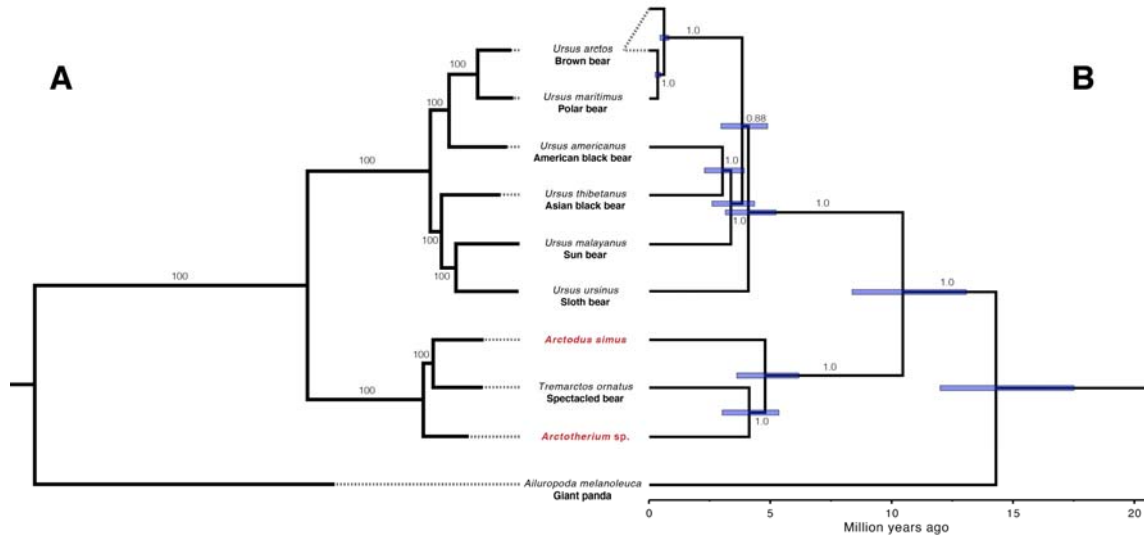

98

99

100 **Figure 1:** Phylogenetic relationships among ursids **A.** Maximum likelihood tree based on nuclear  
101 SNPs constructed in RAxML. Branch labels represent bootstrap support percentages. For  
102 RAxML tree with all individuals analysed see Figure S2. **B.** Bayesian phylogeny based on full  
103 mitochondrial genomes adapted from Mitchell, et al. [12]. Blue bars represent 95% highest  
104 posterior density interval on node ages. Branch labels represent BEAST posterior support  
105 values.

106

107 To test for potential phylogenetic discordance across our short-faced bear genomes, we  
108 constructed phylogenetic trees from 500 kb non-overlapping windows ( $n = 2622$ ) across the  
109 85 largest autosomal scaffolds of the giant panda reference genome (LATN01). Trees created  
110 from roughly 70% of windows agreed with the results from our genome-wide concatenated  
111 dataset (Topology 1; *i.e.* *Tremarctos* + *Arctodus*; Figure 2B & S3). However, approximately  
112 30% of windows instead supported the mitochondrial tree topology (Topology 2; *i.e.*  
113 *Tremarctos* + *Arctotherium*; Figure 2B & S3), while the third possible topology where the  
114 two extinct genera form a clade — *Arctodus* + *Arctotherium* — was rejected for over 95% of  
115 windows. The frequencies of the three possible tree topologies are difficult to explain as a  
116 result of ILS, which we would expect to result in a more even representation of the two  
117 “minority” topologies (*i.e.* Topologies 2 and 3). Our results therefore suggest that  
118 introgression may be the most likely explanation for the observed phylogenetic discordance.  
119 Consequently, we calculated D-statistics [32, 33] using our concatenated genome-wide SNPs  
120 in order to identify signals of hybridisation between the bear species in our dataset.

121

122

123

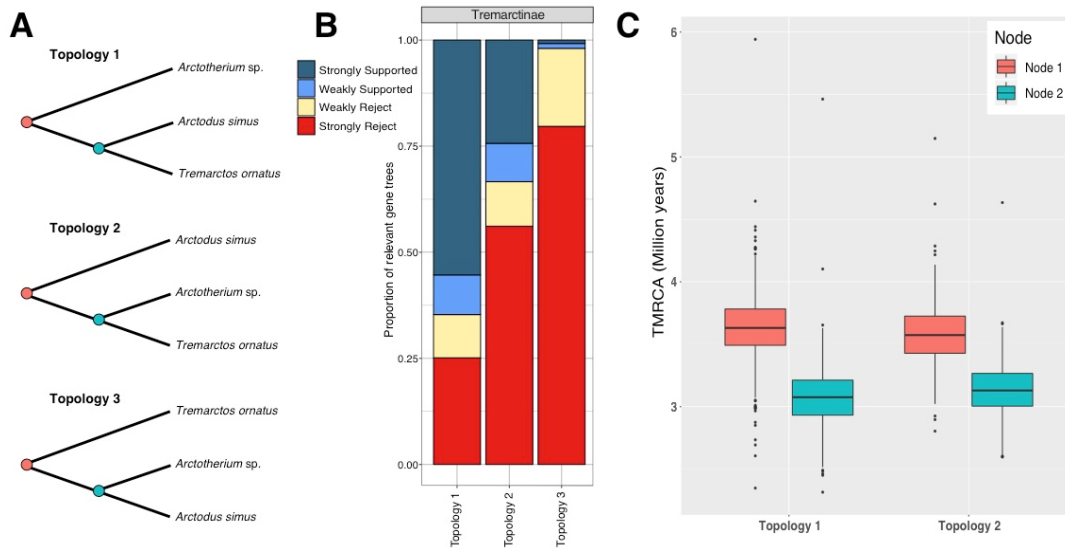

124

125

**Figure 2:** **A.** The three possible short-faced bear (*Tremarctinae*) tree topologies. **B.** Discordance visualisation using DiscoVista from 2622 500 kb genomic fragments. The x-axis represents topologies tested and the y-axis the proportion of fragments that support the topology, with >80% bootstrap support used to define strong support. For more comprehensive tests of phylogenetic placements see Figure S3. **C.** Divergence time estimates (TMRCA) of *Tremarctos*, *Arctodus*, and *Arctotherium* (Node 2) and for sister species (Node 1) of the two most common short-faced bear topologies.

126

127

128

129

130

131

132

133

134

135

136

137

138

139

140

141

142

143

144

145

146

147

148

149

Consistent with previous studies [i.e. 14], our D-statistics revealed compelling evidence for hybridisation between: Asian black bears and all North American ursine bears (including the polar bear); sun bears and North American ursine bears; and Asian black bear and sun bear (Table S4). In contrast, we did not obtain any significantly non-zero values for D-statistics calculated using our two extinct short-faced bear genomes, any member of Ursinae, and the panda outgroup (Table 1). This result suggests that no gene flow occurred between *Arctodus* or *Arctotherium* and the ancestors of any modern ursine bear, and also demonstrates a lack of any discernible reference bias in the ancient genomic data (which would result in asymmetrical allele sharing with the reference). Thus, it appears *Arctodus* and *Arctotherium* did not hybridise with brown and black bears in the Americas during the late Pleistocene, even though the distribution of *Arctodus* overlapped with both ursines, and *Arctotherium* may have encountered them in Mexico or Central America [5]

Contrary to previous studies, our D-statistics revealed signals consistent with gene flow between the spectacled bear and members of Ursinae (Table 1 & S5), suggesting the possibility that *Tremarctos* hybridised with ancestors of either the brown bear or American

150 black bear during the Pleistocene. This signal is surprising given the deep divergence  
151 between ursine and short-faced bears, having split approximately 10 million years ago (mya)  
152 [12, 14, 28]. However, in support of this hypothesis, offspring between spectacled bear and  
153 American black bear have resulted from hybridisation in zoos, although whether these  
154 hybrids were fertile remains unknown [34]. Importantly, members of *Tremarctos* and the  
155 ancestors of modern American black bears had overlapping distributions throughout the  
156 Pleistocene in North America [4, 10], meaning that hybridisation may have occurred when  
157 the two lineages were less divergent and reproductive barriers had had less time to evolve.

158

159         In addition to evidence for hybridisation between *Tremarctos* and ursine bears, we also  
160 recovered convincing evidence for hybridisation between *Arctotherium* and *Tremarctos*  
161 (Table 1). These results are consistent with a model where the divergence between *Arctodus*  
162 and *Tremarctos* occurred in North America after the ancestors of *Arctotherium* dispersed  
163 southwards into South America, with subsequent hybridisation between *Tremarctos* and  
164 *Arctotherium*. This interpretation is supported by the presence of *Arctodus* and *Tremarctos*  
165 (and absence of *Arctotherium*) in the late Pliocene fossil record of North America [3, 4, 7,  
166 10]. The fossil record further suggests that contact between *Tremarctos* and *Arctotherium*  
167 occurred during the late Pleistocene, when representatives of *Arctotherium* were distributed  
168 as far north as the Yucatan of Mexico [5], providing an opportunity for hybridisation.

169 **Table 1:** D-statistics for short-faced bears (Tremarctinae). D-statistics (D), standard error, and Z-Score  
 170 (significant if  $> |3|$ ) are displayed, with ABBA-BABA counts and the number of SNPs  
 171 considered in the analysis. It is clear that there is an excess of allele sharing between the  
 172 spectacled bears (*T. ornatus*) and *Arctotherium*. However, neither of the spectacled bear  
 173 individuals show elevated D-statistics in relation to each other meaning gene flow likely  
 174 occurred in the ancestor of both individuals, or they carry similar proportions of hybridised

| <b>D-statistic: D(H1, H2, H3, Giant Panda)</b>                                        | <b>D</b> | <b>Stderr</b> | <b>Z-Score</b> | <b>BABA</b> | <b>ABBA</b> | <b>nSNPs</b> |
|---------------------------------------------------------------------------------------|----------|---------------|----------------|-------------|-------------|--------------|
| D( <i>T. ornatus</i> (Chaparrí), <i>Arctodus</i> , <i>Arctotherium</i> )              | 0.3116   | 0.009559      | 32.6*          | 41219       | 21633       | 6071021      |
| D( <i>T. ornatus</i> (Nobody), <i>Arctodus</i> , <i>Arctotherium</i> )                | 0.3112   | 0.009462      | 32.889*        | 41187       | 21637       | 6070446      |
| D( <i>T. ornatus</i> (Chaparrí), <i>T. ornatus</i> (Nobody), <i>Arctodus</i> )        | 0.0206   | 0.022575      | 0.911          | 1375        | 1320        | 6393667      |
| D( <i>T. ornatus</i> (Chaparrí), <i>T. ornatus</i> (Nobody), <i>Arctotherium</i> )    | 0.0172   | 0.021533      | 0.801          | 1227        | 1186        | 6258343      |
| D( <i>T. ornatus</i> (Nobody), <i>Arctotherium</i> sp., <i>Ursus arctos</i> )         | 0.2079   | 0.008878      | 23.418*        | 11177       | 7329        | 6184195      |
| D( <i>T. ornatus</i> (Chaparrí), <i>Arctotherium</i> sp., <i>Ursus arctos</i> )       | 0.2074   | 0.009242      | 22.442*        | 11185       | 7342        | 6185696      |
| D( <i>T. ornatus</i> (Nobody), <i>Arctodus simus</i> , <i>Ursus arctos</i> )          | 0.2152   | 0.009651      | 22.302*        | 11172       | 7214        | 6317724      |
| D( <i>T. ornatus</i> (Chaparrí), <i>Arctodus simus</i> , <i>Ursus arctos</i> )        | 0.2131   | 0.010012      | 21.281*        | 11191       | 7260        | 6319318      |
| D( <i>Arctodus simus</i> , <i>Arctotherium</i> sp., <i>Ursus malayanus</i> (Klaus))   | 0.0215   | 0.00854       | 2.523          | 9662        | 9254        | 6010428      |
| D( <i>Arctodus simus</i> , <i>Arctotherium</i> sp., <i>Ursus americanus</i> )         | 0.0225   | 0.009168      | 2.453          | 9661        | 9236        | 6025070      |
| D( <i>Arctodus simus</i> , <i>Arctotherium</i> sp., <i>Ursus malayanus</i> (Anabell)) | 0.0211   | 0.009128      | 2.308          | 9691        | 9291        | 6009103      |
| D( <i>Arctodus simus</i> , <i>Arctotherium</i> sp., <i>Ursus maritimus</i> (PB1))     | 0.0187   | 0.009374      | 1.99           | 9677        | 9323        | 6019285      |
| D( <i>Arctodus simus</i> , <i>Arctotherium</i> sp., <i>Ursus arctos</i> )             | 0.0167   | 0.009247      | 1.802          | 9717        | 9398        | 6033406      |
| D( <i>Arctodus simus</i> , <i>Arctotherium</i> sp., <i>Ursus maritimus</i> (PB9))     | 0.016    | 0.009483      | 1.683          | 9752        | 9446        | 6044167      |
| D( <i>Arctodus simus</i> , <i>Arctotherium</i> sp., <i>Ursus ursinus</i> )            | 0.016    | 0.009584      | 1.666          | 9608        | 9306        | 6012634      |
| D( <i>Arctodus simus</i> , <i>Arctotherium</i> sp., <i>Ursus thibetanus</i> )         | 0.0157   | 0.009487      | 1.652          | 9644        | 9346        | 6019681      |

175 DNA.

176 \*Significantly positive d-statistic, denote deviations from a typical bifurcating tree with H1 and H3 being  
 177 closer than expected

179 If the ancestors of the spectacled bear hybridised with *Arctotherium* somewhere in the  
 180 American mid-latitudes during the migration of *Tremarctos* into South America, then signals  
 181 of gene flow between members of these two genera could date to the latest Pleistocene or  
 182 earliest Holocene, when spectacled bears are thought to have migrated into South America [6,  
 183 35, 36]. To test this hypothesis, we estimated divergence times among the three short-faced  
 184 bear lineages for all 500 kb windows from the largest 40 scaffolds corresponding to either  
 185 Topology 1 (n = 980) or Topology 2 (n = 413) and summarised the results (Figure 2c). The  
 186 age of the most recent common ancestor (TMRCA) of *Tremarctos*, *Arctodus*, and  
 187 *Arctotherium* was similar irrespective of topology (Topology 1: 3.6 mya; Topology 2: 3.6  
 188 mya), as was the subsequent divergence between the remaining two lineages (Topology 1: 3.1  
 189 mya; Topology 2: 3.1 mya). Assuming that members of *Tremarctos* migrated southward no  
 190 earlier than the latest Pleistocene, our results superficially appear to be incompatible with late

191 Pleistocene/Holocene hybridisation between *Tremarctos* and *Arctotherium*. The fossil record  
192 suggests two ways these observations may be explained.

193 Late Pleistocene fossil data indicate that the ancestors of the spectacled bear are likely  
194 to have encountered *Arctotherium* individuals from Mexico, Central America, and/or northern  
195 South America, which were comparable in size and diet to the spectacled bear [1, 5, 37] and  
196 which may have represented a different *Arctotherium* species from the Chilean specimen  
197 sequenced in the present study [1, 6, 12, 26]. Indeed, throughout the Pleistocene a number of  
198 *Arctotherium* species have been described across South and Central America, with putative  
199 species ranging from gigantic in the early-mid Pleistocene to relatively small in the late  
200 Pleistocene [1, 2, 6, 9]. If the ancestors of our sampled Patagonian *Arctotherium* specimen  
201 diverged from those of more northerly *Arctotherium* species during the Pliocene or early  
202 Pleistocene, then our molecular dating results remain consistent with hybridisation being the  
203 primary driver of phylogenetic discordance in our genomic data. Alternatively, hybridisation  
204 between *Tremarctos* and *Arctotherium* could have occurred in Central America during the  
205 Pleistocene. *Tremarctos* and *Arctotherium* have both been recorded in Central American cave  
206 deposits [5, 38], however, the extent of occupation by both genera in the region is unknown,  
207 and conceivably Central America represents a contact zone between the genera throughout the  
208 Pleistocene where hybridisation may have occurred.

209

210 An alternative interpretation of our phylogenetic results is that Topology 2 (*Tremarctos*  
211 + *Arctotherium*), which is supported by the mitochondrion and ~30% of our nuclear genome  
212 windows, is the pre-hybridisation tree. Recently, Li, et al. [39] suggested that under scenarios  
213 involving substantial gene flow the predominant phylogenetic signal across the genome may  
214 not reflect the pre-hybridisation tree. If this were the case for short-faced bears, the majority  
215 of support for Topology 1 would actually result from extensive hybridisation between  
216 *Arctodus* and *Tremarctos* in North America. Li, et al. [39] contend that the phylogenetic  
217 signal of the pre-hybridisation tree may be enriched in regions of low recombination,  
218 especially on the X-chromosome. In order to test this hypothesis, we identified panda  
219 scaffolds corresponding to the ~40 Mb recombination cold-spot on the X-chromosome  
220 highlighted by Li, et al. [39] and produced phylogenetic trees for each 500 kb window along  
221 this region (Figure S4). Interestingly, the majority of these fragments supported Topology 2  
222 (*Tremarctos* + *Arctotherium*), the same topology as the mitochondrial phylogeny but  
223 contrasting with the majority of autosomal scaffolds.

224



225 Unlike felids [e.g. 40, 41, 42], a high-quality reference assembly and linkage map does  
226 not exist for any bear species, meaning scaffolds pertaining to high and low recombination  
227 areas of the genome could not be identified. Unfortunately, this currently makes it impossible  
228 to further explore the possibility that Topology 2 (*Tremarctos* + *Arctotherium*) may reflect the  
229 pre-hybridisation short-faced bear tree, rather than Topology 1 (*Tremarctos* + *Arctodus*). In  
230 the absence of a linkage map, sequencing aDNA from either the extinct *Tremarctos*  
231 *floridanus* or more northerly *Arctotherium* populations will be key to further resolving the  
232 evolutionary history of short-faced bears, though this will be challenging given that the core  
233 range of these species lies in the lower-latitudes where aDNA preservation is less reliable. For  
234 now we conclude that the weight of evidence supports a closer relationship between the  
235 spectacled bear and the extinct short-faced bears from North America (*Arctodus*) rather than  
236 South America (*Arctotherium*). In any case, our genomic data imply extensive hybridisation  
237 occurred between the spectacled bear and one of the extinct short-faced bear lineages. These  
238 results contribute to the growing consensus that hybridisation is widespread among  
239 carnivoran groups generally [13, 14, 39, 43].

240

#### 241 **Acknowledgements:**

242 We would like to thank the following institutions for allowing access to specimens: Canadian  
243 Museum of Nature, University of Kansas Natural History Museum, Yukon Government,  
244 Centro de Estudios del Hombre Austral, Instituto de la Patagonia, Universidad de Magallanes.  
245 In addition, we are grateful to the following individuals who helped in the collection and  
246 identification of specimens and/or provided laboratory support: Grant Zazula (Yukon  
247 Territorial Government, Palaeontology Program, Canada), Fabiana Martin (Universidad de  
248 Magallanes, Chile), Jeremy Austin (University of Adelaide, Australia) and Sarah Bray  
249 (University of Adelaide, Australia). We would like to thank the Wyoming BLM and permit  
250 number PA-13-WY-207. This research was funded by an Australian Research Council  
251 Laureate Fellowship awarded to AC (FL140100260), U.S. National Science Foundation grant  
252 (EAR/SGP#1425059) awarded to JM and AC, and Agencia Nacional de Promoción Científica  
253 y Técnica' (ANPCyT, Argentina) (PICT 2015–966) awarded to FJP.

254

#### 255 **Author Contributions:**

256 Conceptualization, A.T.S., A.C. and K.J.M.; Methodology, A.T.S., G.G., A.C., and K.J.M.;  
257 Investigation, A.T.S., H.H., and K.J.M.; Writing – Original Draft, A.T.S. and K.J.M.; Writing  
258 – Review & Editing, G.G., B.W.S., L.H.S., H.H., A.P., F.J.P., J.M., and A.C.; Funding

259 Acquisition, F.J.P., J.M., and A.C.; Resources, J.M., A.P., and F.J.P.; Supervision, A.C., and  
260 K.J.M.

261 **Materials and Methods:**

262 ***Sampling***

263 Analyses were performed on three bone samples identified as *Arctodus simus* and one sample  
264 identified as *Arctotherium* sp. (Table S1). The *Arctotherium* specimen ACAD 3599, had  
265 previously be radiocarbon dated, as well as one of the *A. simus* specimens (ACAD 438), a  
266 further *A. simus* specimen was radiocarbon dated at the Oxford Radiocarbon Accelerator Unit  
267 of the University of Oxford. All radiocarbon dates were calibrated with the either the IntCal13  
268 curve [44] or the SHCal13 curve [45] using OxCal 4.4 [46] (Table S1).

269

270 ***Sample preparation and extraction***

271 All pre-PCR steps (*i.e.*, extraction, library preparation) were conducted in purpose-built  
272 ancient DNA clean-room facilities at the University of Adelaide's Australian Centre for  
273 Ancient DNA (ACAD). Potential surface contamination on each sample was reduced by UV  
274 irradiation for 15 min each side, followed by abrasion of the exterior surface (c. 1 mm) using  
275 a Dremel tool and a disposable carborundum disk. The sample was then pulverised using a  
276 metallic mallet. Approximately 100 mg of powder was extracted using an in-house silica-  
277 based extraction protocol adapted from Dabney, et al. [47] optimised for the recovery of small  
278 fragments. the powder was digested first in 1 mL 0.5 M EDTA for 60 min, followed by an  
279 overnight incubation in 970  $\mu$ L fresh 0.5 M EDTA and 30  $\mu$ L proteinase K (20 mg/ml) at  
280 55°C. The samples were centrifuged and the supernatant mixed with 13 mL of a modified PB  
281 buffer (12.6 mL PB buffer (Qiagen), 6.5  $\mu$ L Tween-20, and 390  $\mu$ L of 3M Sodium Acetate)  
282 and bound to silicon dioxide particles, which were then washed two times with 80% ethanol.  
283 The DNA was eluted from silica particles with 100  $\mu$ L TE buffer.

284

285 ***Library preparation***

286 Double-stranded Illumina libraries were constructed following the protocol of Meyer, et al.  
287 [48] from 25  $\mu$ L of DNA extract. In addition, all samples underwent partial uracil-DNA  
288 glycosylase (UDG) treatment [49] to restrict cytosine deamination, characteristic of ancient  
289 DNA, to terminal nucleotides. A short round of PCR using PCR primers complementary to  
290 the library adapter sequences was performed to increase the total amount of DNA and add  
291 full-length Illumina sequencing adapters. Cycle number was determined via rtPCR and each  
292 library split into 8 separate PCR reactions to minimise PCR bias and maintain library  
293 complexity. Each PCR of 25  $\mu$ L contained 1 $\times$  HiFi buffer, 2.5 mM MgSO<sub>4</sub>, 1 mM dNTPs,

294 0.5 mM each primer, 0.1 U Platinum Taq Hi-Fi polymerase and 3 µL DNA. The cycling  
295 conditions were 94 °C for 6 min, 8–10 cycles of 94 °C for 30 s, 60 °C for 30 s, and 72 °C for  
296 40 s, followed by 72 °C for 10 min. Following PCR, replicates were pooled and purified using  
297 AxyPrep™ magnetic beads, eluted in 30 µL H<sub>2</sub>O quantified on TapeStation (Agilent  
298 Technologies).

299

### 300 *Sequencing*

301 Libraries were initially pooled and sequenced on an Illumina NextSeq using 2 x 75 bp PE  
302 (150 cycle) High Output chemistry. For deeper sequencing, libraries were diluted to 1.5 nM  
303 and each was run on one lane of an Illumina HiSeq X Ten using 2 x 150 bp PE (300 cycle)  
304 chemistry, except for ACAD 438 which was run on two lanes of an Illumina HiSeq X Ten.

305

### 306 *Data processing*

307 Demultiplexed sequencing reads were processed through Paleomix v1.2.12 [50]. Within  
308 Paleomix, raw reads were filtered, adapter sequences removed, and pair-end reads merged  
309 using ADAPTER REMOVAL v2.1.7 [51], trimming low quality bases (<Phred20 --  
310 minquality 4) and discarding merged reads shorter than 25 bp (--minlength 25). Read quality  
311 was visualised before and after adapter trimming using fastQC v0.11.5  
312 (<http://www.bioinformatics.babraham.ac.uk/projects/fastqc/>) to ensure efficient adapter  
313 removal. Reads were mapped to the Panda ASM200744v1 genome [52] with BWA v0.7.15  
314 using the mem algorithm [53]. Reads with mapping Phred scores less than 25 were removed  
315 using SAMtools 1.5 [54] and PCR duplicates were removed using “paleomix  
316 rmdup\_collapsed” and MARKDUPLICATES from the Picard package  
317 (<http://broadinstitute.github.io/picard/>). Indel realignment was performed using GATK [55]  
318 and damage profiles assessed using MapDamage v2.0.8 [56] (Figure S1).

319

320 Sequencing reads were downloaded from the European Nucleotide Archive for all  
321 extant bear species (Table S2) [14, 21, 24, 57, 58] and processed using the same pipeline as  
322 for the ancient samples.

323

### 324 *Phylogenetic analysis*

325 Indexed VCF files were created for each BAM file using mpileup, part of the SAMtools  
326 package v0.1.19 [54], and the call and index functions as a part of the BCFtools package  
327 v0.1.19. Parallel v2010622 [59] was used to process each BAM file in parallel. BCFtools was

328 then used to filter SNPs within 3 bp of an indel (--SnpGap 3). The 85 largest scaffolds of the  
329 Panda reference genome were renamed as chromosomes (chr1–85) in each VCF file using  
330 BCFtools annotate. Biallelic variants in VCF files were converted to random pseudohaploid  
331 variants in eigenstrat format for the 85 largest scaffolds using vcf2eig (part of eig-utils;  
332 <https://github.com/grahamgower/eig-utils>) including monomorphic (-m) and singleton (-s)  
333 sites, and excluding transitions (-t). Eigenstrat formatted files were then converted to PHYLIP  
334 files using eig2phylip (part of eig-utils; <https://github.com/grahamgower/eig-utils>). A  
335 supermatrix tree was then created in RAxML v8.2.4 [60] using the rapid bootstrapping  
336 algorithm (-f a) and using the GTRCAT model of substitution with ascertainment correction  
337 (-m ASC\_GTRCAT) with 100 bootstrap replicates (-#100) and using the Felsenstein  
338 ascertainment correction (--asc-corr=felsenstein) based on the number of invariant sites  
339 (calculated from the total ungapped length of the largest 85 scaffolds of the Panda reference  
340 genome minus the length of the alignment).

341

#### 342 ***Discordance analysis using DiscoVista***

343 The eigenstrat files were broken down into non-overlapping 500kb sliding windows using  
344 eigreduce (part of eig-utils; <https://github.com/grahamgower/eig-utils>). For each window a  
345 PHYLIP file and tree were created as described above. The frequency and support of different  
346 tree topologies was then summarised and visualised using DiscoVista [61], using bootstrap  
347 values of 80 as the cutoff for strong support. Topologies tested included: 1) the inclusion of  
348 *Arctotherium* with ursine bears; 2) the inclusion of *Arctodus* with ursine bears; 3) the  
349 inclusion of *Tremarctos* with ursine bears; 4) any combination of tremarctine bears included  
350 with ursine bears; 5) the monophyly of Tremarctinae; 6) monophyly of *Tremarctos* and  
351 *Arctodus*; 7) monophyly of *Tremarctos* and *Arctotherium*; and 8) monophyly of *Arctotherium*  
352 and *Arctodus*.

353

#### 354 ***D-statistics***

355 To test for signals of gene flow within Tremarctinae and between tremarctine and ursine  
356 lineages we used D-statistics as implemented by Admixtools [62] in admixr [63]. We only  
357 used the higher coverage *A. simus* sample (ACAD 344) in this analysis. The giant panda was  
358 used as outgroup and block jack-knife procedure used to test for significant departures from  
359 zero ( $|Z| > 3$ ). D-statistics within Tremarctinae were calculated in the form  $D(\textit{Arctodus},$   
360  $\textit{Tremarctos}, \textit{Arctotherium}, \textit{panda})$  and for detecting gene flow between Tremarctinae and  
361 Ursinae in the form  $D(\textit{U1}, \textit{U2}, \textit{T1}, \textit{panda})$ , where T1 is any short-faced bear and U1 and U2

362 any ursine individual. D-statistics were also performed to detect gene flow within Ursinae (as  
363 per Kumar, et al. 2017), using either the giant panda or spectacled bear as outgroup. To  
364 account for the possibility of a reference bias in ancient samples, within Tremarctinae D-  
365 statistics were recalculated using the Asiatic black bear as outgroup (Table S5).

366

### 367 ***Molecular dating***

368 Divergence times were estimated for each 500kb fragment from the discordance analysis  
369 using MCMCtree, part of the PAML package v4.8a [64], using the topology from the ML tree  
370 produced in the discordance analysis as the input tree. Four calibrations were used to calibrate  
371 the phylogeny:

372

- 373 1. The crown-age of Ursidae (*i.e.* the divergence of the giant panda lineage) was  
374 constrained to between 11.6 and 23 million years ago (mya) based on the presence of  
375 *Kretzoiarctos* [65], a putative ailuropodine, in the middle Miocene and the assumption  
376 that early Miocene *Ursavus* representatives are likely ancestral to modern ursids [10].
- 377 2. The divergence of Tremarctinae and Ursinae was constrained to between 7 and 13  
378 mya based on the presence of putative early tremarctine bears (*e.g.* *Plionarctos*) in the  
379 Late Miocene/Early Pliocene [66].
- 380 3. The common ancestor of all sampled ursine bears was constrained to between 4.3 and  
381 6 mya based on the occurrence of *Ursus minimus* [14, 67].
- 382 4. The divergence of polar and brown bears was constrained to between 0.48 and 1.1  
383 mya based on previous nuclear estimates [21, 24, 25].

384

385 The JC +G substitution model with 5 discrete gamma categories was used with  
386 autocorrelated-rates, also known as the geometric Brownian diffusion clock model. Uniform  
387 priors for node ages using the birth-death (BD) process were used [ $\lambda_{BD} = 1$  (birth-rate),  $\mu_{BD} =$   
388 1 (death-rate), and  $\rho_{BD} = 0.1$  (sampling fraction for extant species)]. A gamma-Dirichlet  
389 distribution was used for the prior on rate with an  $\alpha$  shape parameter of 2 (diffuse prior). The  
390  $\sigma_i^2$  prior was defined as a diffuse gamma-Dirichlet distribution (2,2). MCMC tree runs were  
391 performed with a burn-in of 10000, and a sample size of 10000, sampling every ten iterations.  
392 Median node ages were then averaged for each tree topology.

393

394

395

396 ***Low-recombining region of X-chromosome***

397 Scaffolds of the panda ASM200744v1 reference genome [52] corresponding to low  
398 recombination regions of the X chromosome were identified by mapping all scaffolds to the  
399 recombination cold-spot of the X chromosome of the domestic cat (FelCat5) using minimap2.  
400 Default parameters were used, meaning the alignment lacked base-level precision (to account  
401 to phylogenetic distance between giant panda and the domestic cat). Only scaffolds larger  
402 than 500kb and with greater than 100 kb of segments mapping to the low recombining region  
403 of the domestic cat X-chromosome were retained, resulting in 15 scaffolds linked to the low  
404 recombination region of the X-chromosome. A maximum-likelihood phylogenetic tree and  
405 gene-tree discordance analysis were performed on these 15 scaffolds as described above for  
406 the genome-wide dataset.

407

408

409 **References:**

- 410 1. Soibelzon, L.H., Tonni, E.P., and Bond, M. (2005). The fossil record of South  
411 American short-faced bears (Ursidae, Tremarctinae). *J. South Am. Earth Sci.* 20, 105-  
412 113.
- 413 2. Soibelzon, L.H. (2004). Revisión sistemática de los Tremarctinae (Carnivora, Ursidae)  
414 fósiles de América del Sur. *Rev. Mus. Argent. Cienc. Nat* 6, 107-133.
- 415 3. Kurtén, B. (1966). Pleistocene bears of North America. 1. Genus *Trematctos*, spectacled  
416 bears. *Acta Zool. Fenn.* 115, 1-120.
- 417 4. Kurtén, B., and Anderson, E. (1980). *Pleistocene Mammals of North America*, (New  
418 York: Columbia University Press).
- 419 5. Schubert, B.W., Chatters, J.C., Arroyo-Cabrales, J., Samuels, J.X., Soibelzon, L.H.,  
420 Prevosti, F.J., Widga, C., Nava, A., Rissolo, D., and Erreguerena, P.L. (2019). Yucatan  
421 carnivorans shed light on the Great American Biotic Interchange. *Biol Lett* 15,  
422 20190148.
- 423 6. Prevosti, F.J. (2018). *Evolution of South American Mammalian Predators During the*  
424 *Cenozoic: Paleobiogeographic and Paleoenvironmental Contingencies*, 1st ed. 2018.  
425 Edition, (Cham: Springer International Publishing).
- 426 7. Kurtén, B. (1967). Pleistocene bears of North America. 2. Genus *Arctodus*, short-faced  
427 bears. *Acta Zool. Fenn.* 117, 1-60.
- 428 8. Christiansen, P. (1999). What size were *Arctodus simus* and *Ursus spelaeus* (Carnivora:  
429 Ursidae)? *Ann. Zool. Fenn.* 36, 93-102.

- 430 9. Soibelzon, L.H., and Schubert, B.W. (2011). The largest known bear, *Arctotherium*  
431 *angustidens*, from the early Pleistocene Pampean region of Argentina: with a discussion  
432 of size and diet trends in bears. *J. Paleontol.* 85, 69-75, 67.
- 433 10. McLellan, B., and Reiner, D.C. (1994). A review of bear evolution. *Bears Their Biol.*  
434 *Manag.* 9, 85-96.
- 435 11. Trajano, E., and Ferrarezzi, H. (1995). A Fossil Bear from Northeastern Brazil, with a  
436 Phylogenetic Analysis of the South American Extinct Tremarctinae (Ursidae). *J.*  
437 *Vertebr. Paleontol.* 14, 552-561.
- 438 12. Mitchell, K.J., Bray, S.C., Bover, P., Soibelzon, L., Schubert, B.W., Prevosti, F., Prieto,  
439 A., Martin, F., Austin, J.J., and Cooper, A. (2016). Ancient mitochondrial DNA reveals  
440 convergent evolution of giant short-faced bears (Tremarctinae) in North and South  
441 America. *Biol. Lett.* 12, 20160062.
- 442 13. Kutschera, V.E., Bidon, T., Hailer, F., Rodi, J.L., Fain, S.R., and Janke, A. (2014).  
443 Bears in a forest of gene trees: Phylogenetic inference is complicated by incomplete  
444 lineage sorting and gene flow. *Mol. Biol. Evol.* 31, 2004-2017.
- 445 14. Kumar, V., Lammers, F., Bidon, T., Pfenninger, M., Kolter, L., Nilsson, M.A., and  
446 Janke, A. (2017). The evolutionary history of bears is characterized by gene flow across  
447 species. *Sci. Rep.* 7, 46487.
- 448 15. Funk, D.J., and Omland, K.E. (2003). Species-Level Paraphyly and Polyphyly:  
449 Frequency, Causes, and Consequences, with Insights from Animal Mitochondrial DNA.  
450 *Annu. Rev. Ecol. Evol. Syst.* 34, 397-423.
- 451 16. Leache, A.D., and McGuire, J.A. (2006). Phylogenetic relationships of horned lizards  
452 (*Phrynosoma*) based on nuclear and mitochondrial data: evidence for a misleading  
453 mitochondrial gene tree. *Mol. Phylogenet. Evol.* 39, 628-644.
- 454 17. Wallis, G.P., Cameron-Christie, S.R., Kennedy, H.L., Palmer, G., Sanders, T.R., and  
455 Winter, D.J. (2017). Interspecific hybridization causes long-term phylogenetic  
456 discordance between nuclear and mitochondrial genomes in freshwater fishes. *Mol.*  
457 *Ecol.* 26, 3116-3127.
- 458 18. Toews, D.P., and Brelsford, A. (2012). The biogeography of mitochondrial and nuclear  
459 discordance in animals. *Mol. Ecol.* 21, 3907-3930.
- 460 19. Gompert, Z., Forister, M.L., Fordyce, J.A., and Nice, C.C. (2008). Widespread mito-  
461 nuclear discordance with evidence for introgressive hybridization and selective sweeps  
462 in *Lycaeides*. *Mol. Ecol.* 17, 5231-5244.
- 463 20. Barlow, A., Cahill, J.A., Hartmann, S., Theunert, C., Xenikoudakis, G., Fortes, G.G.,  
464 Paijmans, J.L.A., Rabeder, G., Frischauf, C., Grandal-d'Anglade, A., et al. (2018).  
465 Partial genomic survival of cave bears in living brown bears. *Nat. Ecol. Evol.* 2, 1563-  
466 1570.
- 467 21. Cahill, J.A., Green, R.E., Fulton, T.L., Stiller, M., Jay, F., Ovsyanikov, N., Salamzade,  
468 R., St. John, J., Stirling, I., Slatkin, M., et al. (2013). Genomic evidence for island



- 469 population conversion resolves conflicting Theories of polar bear evolution. PLoS  
470 Genet. 9, e1003345.
- 471 22. Cahill, J.A., Stirling, I., Kistler, L., Salamzade, R., Ersmark, E., Fulton, T.L., Stiller, M.,  
472 Green, R.E., and Shapiro, B. (2015). Genomic evidence of geographically widespread  
473 effect of gene flow from polar bears into brown bears. Mol. Ecol. 24, 1205-1217.
- 474 23. Hailer, F. (2015). Introgressive hybridization: brown bears as vectors for polar bear  
475 alleles. Mol. Ecol. 24, 1161-1163.
- 476 24. Liu, S.P., Lorenzen, E.D., Fumagalli, M., Li, B., Harris, K., Xiong, Z.J., Zhou, L.,  
477 Korneliussen, T.S., Somel, M., Babbitt, C., et al. (2014). Population genomics reveal  
478 recent speciation and rapid evolutionary adaptation in polar bears. Cell 157, 785-794.
- 479 25. Hailer, F., Kutschera, V.E., Hallstrom, B.M., Klassert, D., Fain, S.R., Leonard, J.A.,  
480 Arnason, U., and Janke, A. (2012). Nuclear genomic sequences reveal that polar bears  
481 are an old and distinct bear lineage. Science 336, 344-347.
- 482 26. Martin, F.M., Prieto, A., Morello, F., Prevosti, F., and Borrero, L. (2004). Late  
483 Pleistocene megafauna at Cueva del Puma, Pali-Aike Lava Field, Chile. Curr. Res.  
484 Pleistocene 21, 101-103.
- 485 27. Harington, C.R., Naughton, D., Dalby, A., Rose, M., and Dawson, J. (2003). Annotated  
486 Bibliography of Quaternary Vertebrates of Northern North America, (Toronto:  
487 University of Toronto Press).
- 488 28. Krause, J., Unger, T., Nocon, A., Malaspinas, A.S., Kolokotronis, S.O., Stiller, M.,  
489 Soibelzon, L., Spriggs, H., Dear, P.H., Briggs, A.W., et al. (2008). Mitochondrial  
490 genomes reveal an explosive radiation of extinct and extant bears near the Miocene-  
491 Pliocene boundary. BMC Evol. Biol. 8, 220.
- 492 29. Nichols, R. (2001). Gene trees and species trees are not the same. Trends Ecol. Evol.  
493 16, 358-364.
- 494 30. Maddison, W.P. (1997). Gene trees in species trees. Syst. Biol. 46, 523-536.
- 495 31. Cahill, J.A., Heintzman, P.D., Harris, K., Teasdale, M.D., Kapp, J., Soares, A.E.R.,  
496 Stirling, I., Bradley, D., Edwards, C.J., Graim, K., et al. (2018). Genomic evidence of  
497 widespread admixture from polar bears into brown bears during the last ice age. Mol.  
498 Biol. Evol. 35, 1120-1129.
- 499 32. Green, R.E., Krause, J., Briggs, A.W., Maricic, T., Stenzel, U., Kircher, M., Patterson,  
500 N., Li, H., Zhai, W.W., Fritz, M.H.Y., et al. (2010). A Draft Sequence of the Neandertal  
501 Genome. Science 328, 710-722.
- 502 33. Durand, E.Y., Patterson, N., Reich, D., and Slatkin, M. (2011). Testing for ancient  
503 admixture between closely related populations. Mol. Biol. Evol. 28, 2239-2252.
- 504 34. Mondolfi, E., and Boede, E. (1981). A hybrid of a spectacled bear (*Tremarctos ornatus*)  
505 and an asiatic black bear (*Selenarctos thibetanus*) born at the Maracay zoological park,  
506 Venezuela. Mem. Soc. Cienc. Nat. La Salle 41, 143-148.

- 507 35. Stucchi, M., Salas-Gismondi, R., Baby, P., Guyot, J.-L., and Shockey, B.J. (2009). A  
508 6,000 year-old specimen of a spectacled bear from an Andean cave in Peru. *Ursus* 20,  
509 63-68.
- 510 36. García-Rangel, S. (2012). Andean bear *Tremarctos ornatus* natural history and  
511 conservation. *Mammal Rev.* 42, 85-119.
- 512 37. Figueirido, B., and Soibelzon, L.H. (2010). Inferring palaeoecology in extinct  
513 tremarctine bears (Carnivora, Ursidae) using geometric morphometrics. *Lethaia* 43,  
514 209-222.
- 515 38. Czaplewski, N.J., Krejca, J., and Miller, T.E. (2003). Late quaternary bats from Cebada  
516 Cave, Chiquibul cave system, Belize. *Caribb. J. Sci.* 39, 23-33.
- 517 39. Li, G., Figueiro, H.V., Eizirik, E., and Murphy, W.J. (2019). Recombination-aware  
518 phylogenomics reveals the structured genomic landscape of hybridizing cat species.  
519 *Mol. Biol. Evol.* 36, 2111-2126.
- 520 40. Menotti-Raymond, M., David, V.A., Roelke, M.E., Chen, Z.Q., Menotti, K.A., Sun, S.,  
521 Schaffer, A.A., Tomlin, J.F., Agarwala, R., O'Brien, S.J., et al. (2003). Second-  
522 generation integrated genetic linkage/radiation hybrid maps of the domestic cat (*Felis*  
523 *catus*). *J. Hered.* 94, 95-106.
- 524 41. Menotti-Raymond, M., David, V.A., Lyons, L.A., Schaffer, A.A., Tomlin, J.F., Hutton,  
525 M.K., and O'Brien, S.J. (1999). A genetic linkage map of microsatellites in the domestic  
526 cat (*Felis catus*). *Genomics* 57, 9-23.
- 527 42. Li, G., Hillier, L.W., Grahn, R.A., Zimin, A.V., David, V.A., Menotti-Raymond, M.,  
528 Middleton, R., Hannah, S., Hendrickson, S., Makunin, A., et al. (2016). A high-  
529 resolution SNP array-based linkage map anchors a new domestic cat draft genome  
530 assembly and provides detailed patterns of recombination. *G3 (Bethesda)* 6, 1607-1616.
- 531 43. Li, G., Davis, B.W., Eizirik, E., and Murphy, W.J. (2016). Phylogenomic evidence for  
532 ancient hybridization in the genomes of living cats (Felidae). *Genome Res.* 26, 1-11.
- 533 44. Reimer, P.J., Bard, E., Bayliss, A., Beck, J.W., Blackwell, P.G., Ramsey, C.B., Buck,  
534 C.E., Cheng, H., Edwards, R.L., Friedrich, M., et al. (2013). Intcal13 and Marine13  
535 radiocarbon age calibration curves 0-50,000 years cal BP. *Radiocarbon* 55, 1869-1887.
- 536 45. Hogg, A.G., Hua, Q., Blackwell, P.G., Niu, M., Buck, C.E., Guilderson, T.P., Heaton,  
537 T.J., Palmer, J.G., Reimer, P.J., Reimer, R.W., et al. (2013). Shcal13 Southern  
538 Hemisphere Calibration, 0-50,000 Years Cal Bp. *Radiocarbon* 55, 1889-1903.
- 539 46. Ramsey, C.B. (2009). Bayesian analysis of radiocarbon dates. *Radiocarbon* 51, 337-  
540 360.
- 541 47. Dabney, J., Knapp, M., Glocke, I., Gansauge, M.-T., Weihmann, A., Nickel, B.,  
542 Valdiosera, C., García, N., Pääbo, S., Arsuaga, J.-L., et al. (2013). Complete  
543 mitochondrial genome sequence of a Middle Pleistocene cave bear reconstructed from  
544 ultrashort DNA fragments. *Proc. Natl. Acad. Sci. U. S. A.* 110, 15758-15763.

- 545 48. Meyer, M., Kircher, M., Gansauge, M.T., Li, H., Racimo, F., Mallick, S., Schraiber,  
546 J.G., Jay, F., Prufer, K., de Filippo, C., et al. (2012). A high-coverage genome sequence  
547 from an archaic Denisovan individual. *Science* 338, 222-226.
- 548 49. Rohland, N., Harney, E., Mallick, S., Nordenfelt, S., and Reich, D. (2015). Partial  
549 uracil-DNA-glycosylase treatment for screening of ancient DNA. *Philos. Trans. R. Soc.*  
550 *Lond. B. Biol. Sci* 370, 20130624.
- 551 50. Schubert, M., Ermini, L., Sarkissian, C.D., Jonsson, H., Ginolhac, A., Schaefer, R.,  
552 Martin, M.D., Fernandez, R., Kircher, M., McCue, M., et al. (2014). Characterization of  
553 ancient and modern genomes by SNP detection and phylogenomic and metagenomic  
554 analysis using PALEOMIX. *Nat. Protoc.* 9, 1056-1082.
- 555 51. Schubert, M., Lindgreen, S., and Orlando, L. (2016). AdapterRemoval v2: rapid adapter  
556 trimming, identification, and read merging. *BMC Res. Notes* 9, 88.
- 557 52. Hu, Y., Wu, Q., Ma, S., Ma, T., Shan, L., Wang, X., Nie, Y., Ning, Z., Yan, L., Xiu, Y.,  
558 et al. (2017). Comparative genomics reveals convergent evolution between the bamboo-  
559 eating giant and red pandas. *Proc. Natl. Acad. Sci. U. S. A.* 114, 1081-1086.
- 560 53. Li, H., and Durbin, R. (2009). Fast and accurate short read alignment with Burrows-  
561 Wheeler transform. *Bioinformatics* 25, 1754-1760.
- 562 54. Li, H., Handsaker, B., Wysoker, A., Fennell, T., Ruan, J., Homer, N., Marth, G.,  
563 Abecasis, G., Durbin, R., and Genome Project Data Processing, S. (2009). The sequence  
564 alignment/map format and SAMtools. *Bioinformatics* 25, 2078-2079.
- 565 55. McKenna, A., Hanna, M., Banks, E., Sivachenko, A., Cibulskis, K., Kernytsky, A.,  
566 Garimella, K., Altshuler, D., Gabriel, S., Daly, M., et al. (2010). The Genome Analysis  
567 Toolkit: a MapReduce framework for analyzing next-generation DNA sequencing data.  
568 *Genome Res.* 20, 1297-1303.
- 569 56. Jonsson, H., Ginolhac, A., Schubert, M., Johnson, P.L.F., and Orlando, L. (2013).  
570 mapDamage2.0: fast approximate Bayesian estimates of ancient DNA damage  
571 parameters. *Bioinformatics* 29, 1682-1684.
- 572 57. Zhao, S.C., Zheng, P.P., Dong, S.S., Zhan, X.J., Wu, Q., Guo, X.S., Hu, Y.B., He,  
573 W.M., Zhang, S.N., Fan, W., et al. (2013). Whole-genome sequencing of giant pandas  
574 provides insights into demographic history and local adaptation. *Nat. Genet.* 45, 67-  
575 U99.
- 576 58. Miller, W., Schuster, S.C., Welch, A.J., Ratan, A., Bedoya-Reina, O.C., Zhao, F.Q.,  
577 Kim, H.L., Burhans, R.C., Drautz, D.I., Wittekindt, N.E., et al. (2012). Polar and brown  
578 bear genomes reveal ancient admixture and demographic footprints of past climate  
579 change. *Proc. Natl. Acad. Sci. U. S. A.* 109, E2382-E2390.
- 580 59. Tange, O. (2011). Gnu parallel-the command-line power tool. *The USENIX Magazine*  
581 36, 42-47.
- 582 60. Stamatakis, A. (2014). RAxML version 8: a tool for phylogenetic analysis and post-  
583 analysis of large phylogenies. *Bioinformatics* 30, 1312-1313.

- 584 61. Sayyari, E., Whitfield, J.B., and Mirarab, S. (2018). DiscoVista: Interpretable  
585 visualizations of gene tree discordance. *Mol. Phylogenet. Evol.* *122*, 110-115.
- 586 62. Patterson, N., Moorjani, P., Luo, Y., Mallick, S., Rohland, N., Zhan, Y., Genschoreck,  
587 T., Webster, T., and Reich, D. (2012). Ancient admixture in human history. *Genetics*  
588 *192*, 1065-1093.
- 589 63. Petr, M., Vernot, B., and Kelso, J. (2019). admixr-R package for reproducible analyses  
590 using ADMIXTOOLS. *Bioinformatics* *35*, 3194-3195.
- 591 64. Yang, Z. (2007). PAML 4: phylogenetic analysis by maximum likelihood. *Mol. Biol.*  
592 *Evol.* *24*, 1586-1591.
- 593 65. Abella, J., Alba, D.M., Robles, J.M., Valenciano, A., Rotgers, C., Carmona, R.,  
594 Montoya, P., and Morales, J. (2012). *Kretzoiarctos* gen. nov., the oldest member of the  
595 giant panda clade. *PLoS ONE* *7*, e48985.
- 596 66. Tedford, R.H., and Martin, J. (2001). *Plionarctos*, a tremarctine bear (Ursidae:  
597 Carnivora) from western North America. *J. Vertebr. Paleontol.* *21*, 311-321.
- 598 67. Vangengeim, E.A., Vislobokova, I., and Sotnikova, M. (1998). Large Ruscinian  
599 Mammalia in the territory of the former Soviet Union. *Stratigr. Geol. Correl* *6*, 368-382.  
600
